# Supplementary material for: Virologic and immunologic outcomes of treatment with integrase inhibitors in a real-world setting: The RESPOND cohort consortium
Source: PubMed Central journal article supplement (PMC7774984; doi:10.1371/journal.pone.0243625), 2020-12-31
Supplement: pone.0243625.s001.pdf [file pone.0243625.s001.pdf]

**S1 Table. Baseline demographics and clinical characteristics of individuals stratified by treatment status at baseline.**

|                          |                            | All   |        | ART-Naive |        | ART-Experienced<br>VL ≥200 cp/mL at baseline |        | ART-Experienced<br>VL <200 cp/mL at baseline |        |
|--------------------------|----------------------------|-------|--------|-----------|--------|----------------------------------------------|--------|----------------------------------------------|--------|
|                          |                            | n     | %      | n         | %      | n                                            | %      | n                                            | %      |
|                          |                            | 13703 | 100.0  | 7147      | 52.2   | 3102                                         | 22.6   | 3454                                         | 25.2   |
| Sex                      | Female                     | 10313 | (75.3) | 3723      | (82.3) | 5839                                         | (73.3) | 751                                          | (61.9) |
|                          | Male                       | 3390  | (24.7) | 798       | (17.7) | 2130                                         | (26.7) | 462                                          | (38.1) |
| Ethnicity                | White                      | 9625  | (70.2) | 3166      | (70.0) | 5718                                         | (71.8) | 741                                          | (61.1) |
|                          | Other                      | 2162  | (15.8) | 670       | (14.8) | 1180                                         | (14.8) | 312                                          | (25.7) |
|                          | Unknown                    | 1916  | (14.0) | 685       | (15.2) | 1071                                         | (13.4) | 160                                          | (13.2) |
| Region                   | South Europe and Argentina | 3825  | (27.9) | 2039      | (45.1) | 1585                                         | (19.9) | 201                                          | (16.6) |
|                          | West Central Europe        | 7364  | (53.7) | 1923      | (42.5) | 4708                                         | (59.1) | 733                                          | (60.4) |
|                          | North Europe and Australia | 1489  | (10.9) | 302       | (6.7)  | 1055                                         | (13.2) | 132                                          | (10.9) |
|                          | Central East Europe        | 623   | (4.5)  | 62        | (1.4)  | 480                                          | (6.0)  | 81                                           | (6.7)  |
|                          | East Europe                | 402   | (2.9)  | 195       | (4.3)  | 141                                          | (1.8)  | 66                                           | (5.4)  |
| Route of HIV acquisition | MSM                        | 6322  | (46.1) | 2604      | (57.6) | 3372                                         | (42.3) | 346                                          | (28.5) |
|                          | IDU                        | 1768  | (12.9) | 267       | (5.9)  | 1275                                         | (16.0) | 226                                          | (18.6) |
|                          | Heterosexual               | 4626  | (33.8) | 1368      | (30.3) | 2722                                         | (34.2) | 536                                          | (44.2) |
|                          | Other/Unknown              | 987   | (7.2)  | 282       | (6.2)  | 600                                          | (7.5)  | 105                                          | (8.7)  |
| ARV anchor drug          | INSTI                      | 7147  | (52.2) | 1914      | (42.3) | 538                                          | (44.4) | 4695                                         | (58.9) |
|                          | PI/b                       | 3102  | (22.6) | 1248      | (27.6) | 500                                          | (41.2) | 1354                                         | (17.0) |
|                          | NNRTI                      | 3454  | (25.2) | 1359      | (30.1) | 175                                          | (14.4) | 1920                                         | (24.1) |
| NRTI Backbone            | TDF/FTC                    | 8158  | (59.5) | 3314      | (73.3) | 4103                                         | (51.5) | 741                                          | (61.1) |
|                          | TAF/FTC                    | 1116  | (8.1)  | 307       | (6.8)  | 762                                          | (9.6)  | 47                                           | (3.9)  |
|                          | ABC/3TC                    | 3720  | (27.1) | 826       | (18.3) | 2604                                         | (32.7) | 290                                          | (23.9) |
|                          | Other                      | 709   | (5.2)  | 74        | (1.6)  | 500                                          | (6.3)  | 135                                          | (11.1) |
| Prior AIDS               | Yes                        | 2741  | (20.0) | 373       | (8.3)  | 1991                                         | (25.0) | 377                                          | (31.1) |
| Hepatitis B              | Positive                   | 633   | (4.6)  | 114       | (2.5)  | 459                                          | (5.8)  | 60                                           | (4.9)  |
| Hepatitis C              | Positive                   | 2731  | (19.9) | 382       | (8.4)  | 2042                                         | (25.6) | 307                                          | (25.3) |
| BMI (kg/m <sup>2</sup> ) | ≤18                        | 332   | (2.4)  | 102       | (2.3)  | 187                                          | (2.3)  | 43                                           | (3.5)  |
|                          | 18-25                      | 6143  | (44.8) | 1830      | (40.5) | 3773                                         | (47.3) | 540                                          | (44.5) |
|                          | 25-30                      | 2716  | (19.8) | 640       | (14.2) | 1879                                         | (23.6) | 197                                          | (16.2) |
|                          | >30                        | 877   | (6.4)  | 153       | (3.4)  | 634                                          | (8.0)  | 90                                           | (7.4)  |
| Smoking                  | Current                    | 4241  | (30.9) | 1192      | (26.4) | 2622                                         | (32.9) | 427                                          | (35.2) |
| Hypertension             | Yes                        | 3402  | (24.8) | 603       | (13.3) | 2512                                         | (31.5) | 287                                          | (23.7) |
| Diabetes                 | Yes                        | 731   | (5.3)  | 77        | (1.7)  | 590                                          | (7.4)  | 64                                           | (5.3)  |
| Cardiovascular disease   | Yes                        | 386   | (2.8)  | 16        | (0.4)  | 342                                          | (4.3)  | 28                                           | (2.3)  |
| Chronic kidney disease   | Yes                        | 400   | (2.9)  | 4         | (0.1)  | 363                                          | (4.6)  | 33                                           | (2.7)  |

|                                                 | All           |                 | ART-Naïve     |               | ART-Experienced<br>VL ≥200 cp/mL at baseline |               | ART-Experienced<br>VL <200 cp/mL at baseline |               |
|-------------------------------------------------|---------------|-----------------|---------------|---------------|----------------------------------------------|---------------|----------------------------------------------|---------------|
|                                                 | n             | %               | n             | %             | n                                            | %             | n                                            | %             |
|                                                 | 13703         | 100.0           | 7147          | 52.2          | 3102                                         | 22.6          | 3454                                         | 25.2          |
| <b>Continuous variables</b>                     | <b>Median</b> | <b>(IQR)</b>    | <b>Median</b> | <b>(IQR)</b>  | <b>Median</b>                                | <b>(IQR)</b>  | <b>Median</b>                                | <b>(IQR)</b>  |
| Age (years)                                     | 46            | [37-53]         | 38            | [31-47]       | 49                                           | [42-55]       | 44                                           | [37-51]       |
| Baseline CD4 (cells/μL)                         | 510           | [328-724]       | 360           | [200-510]     | 629                                          | [460-828]     | 321                                          | [151-509]     |
| Nadir CD4 (cells/μL)                            | 228           | [105-358]       | 340           | [191-468]     | 195                                          | [88-290]      | 155                                          | [51-283]      |
| ARV drugs previous taken*(n)                    | 6             | [3-8]           | -             | -             | 6                                            | [4-8]         | 5                                            | [3-7]         |
| Years since initiation of first ARV*<br>(years) | 11            | [6-17]          | -             | -             | 11                                           | [6-17]        | 9                                            | [4-14]        |
| Baseline date (mm/yy)                           | 10/14         | [07/13 – 08/16] | 06/14         | [10/14-04/16] | 07/13                                        | [07/12-09/14] | 06/13                                        | [03/12-08/14] |

All percentages are column percentages

The proportion of individuals with unknown/missing data were (%): Mode of transmission 6.8; ethnicity 11.8; hepatitis B 16.8; hepatitis C 13.8; BMI 29.5; smoking status 39.0; hypertension 28.9; diabetes 8.5; cardiovascular disease 26.3; chronic kidney disease 19.2.

Regions: West Central Europe: Austria, Belgium, France, Germany, Luxembourg, Switzerland; South Europe and Argentina: Argentina, Greece, Israel, Italy, Portugal, Spain; North Europe and Australia: Australia, Denmark, Norway, Sweden, Finland, Iceland, Ireland, Netherlands, United Kingdom; East Central Europe: Bosnia-Herzegovina, Croatia, Czech Republic, Hungary, Poland, Romania, Serbia, Slovenia, Slovakia; Eastern Europe: Belarus, Estonia, Georgia, Latvia, Lithuania, Russia, Ukraine .

Hypertension: Defined as use of antihypertensive drugs, systolic blood pressure >140 mmHg and/or diastolic blood pressure >90 mmHg.

Diabetes: A clinical diagnosis of diabetes, use of antidiabetic drugs and/or blood glucose measurement ≥11.1 mmol/l or HbA1C ≥48 mmol/mol.

HCV Positive: Positive if ever had a positive HCV antibody test, HCV RNA test, HCV genotype, or received HCV treatment prior to baseline. HBV positive: Hepatitis B surface antigen positive

Chronic kidney disease: Defined as confirmed (>3 months apart) eGFR ≤ 60 ml/min/1.73 m<sup>2</sup>, calculated by the CKD-EPI formula.

Cardiovascular disease includes prior myocardial infarction, stroke or invasive cardiovascular procedure.

\*Among ART-experienced

Abbreviations: 3TC, lamivudine; ABC, abacavir; ART, anti-retroviral therapy; ARV, anti-retroviral drug; BMI, body-mass index; cp, copies of RNA; FTC, emtricitabine; IDU, intravenous drug user; MSM, men who have sex with men; NRTI, nucleos(t)ide reverse transcriptase inhibitor; TDF: tenofovir disoproxil fumarate; TAF: tenofovir alafenamide; VL, viral load.

All p-values for comparisons were < 0.001
