# Supplementary material for: Virologic and immunologic outcomes of treatment with integrase inhibitors in a real-world setting: The RESPOND cohort consortium
Source: PubMed Central journal article supplement (PMC7774984; doi:10.1371/journal.pone.0243625), 2020-12-31
Supplement: pone.0243625.s002.pdf [file pone.0243625.s002.pdf]

**S2 Table. Numbers and proportions of individuals with cTO success, on-treatment success and immunologic responses at 12 ± 3 months, stratified by treatment status at baseline**

| Outcomes                                      | Treatment status at baseline               | All  |       |        |               | INSTI |       |        |               | PI/b |       |        |               | NNRTI |        |        |               | p-value |
|-----------------------------------------------|--------------------------------------------|------|-------|--------|---------------|-------|-------|--------|---------------|------|-------|--------|---------------|-------|--------|--------|---------------|---------|
|                                               |                                            | n    | total | (%)    | 95% CI        | n     | total | (%)    | 95% CI        | n    | Total | (%)    | 95% CI        | n     | total) | (%)    | 95% CI        |         |
| cTO <200 cp/mL*                               | All                                        | 8215 | 13703 | (60.0) | [59.1 - 60.8] | 4398  | 7147  | (61.5) | [60.4 - 62.7] | 1616 | 3102  | (52.1) | [50.3 - 53.9] | 2201  | 3454   | (63.7) | [62.1 - 65.3] | <0.001  |
|                                               | ART-Naïve                                  | 2642 | 4521  | (58.4) | [57.0 - 59.9] | 1169  | 1914  | (61.1) | [58.9 - 63.3] | 622  | 1248  | (49.8) | [47.1 - 52.6] | 851   | 1359   | (62.6) | [60.0 - 65.2] | <0.001  |
|                                               | ART-experienced, VL ≥200 cp/mL at baseline | 528  | 1213  | (43.5) | [40.7 - 46.3] | 240   | 538   | (44.6) | [40.4 - 48.8] | 216  | 500   | (43.2) | [38.9 - 47.5] | 72    | 175    | (41.1) | [33.9 - 48.4] | 0.71    |
|                                               | ART-experienced, VL <200 cp/mL at baseline | 5045 | 7969  | (63.3) | [62.2 - 64.4] | 2989  | 4695  | (63.7) | [62.3 - 65.0] | 778  | 1354  | (57.5) | [54.8 - 60.1] | 1278  | 1920   | (66.6) | [64.5 - 68.7] | <0.001  |
| On-treatment analysis <200 cp/mL**            | All                                        | 8273 | 8497  | (97.4) | [97.0 - 97.7] | 4431  | 4513  | (98.2) | [97.8 - 98.6] | 1628 | 1721  | (94.6) | [93.5 - 95.7] | 2214  | 2263   | (97.8) | [97.2 - 98.4] | <0.001  |
|                                               | ART-Naïve                                  | 2693 | 2780  | (96.9) | [96.2 - 97.5] | 1189  | 1211  | (98.2) | [97.4 - 98.9] | 638  | 674   | (94.7) | [93.0 - 96.4] | 866   | 895    | (96.8) | [95.6 - 97.9] | <0.001  |
|                                               | ART-experienced, VL ≥200cp/mL at baseline  | 532  | 604   | (88.1) | [85.5 - 90.7] | 242   | 265   | (91.3) | [87.9 - 94.7] | 218  | 256   | (85.2) | [80.8 - 89.5] | 72    | 83     | (86.7) | [79.5 - 94.0] | 0.08    |
|                                               | ART-experienced, VL <200 cp/mL at baseline | 5048 | 5113  | (98.7) | [98.4 - 99.0] | 3000  | 3037  | (98.8) | [98.4 - 99.2] | 772  | 791   | (97.6) | [96.5 - 98.7] | 1276  | 1285   | (99.3) | [98.8 - 99.8] | 0.003   |
| ≥25 % CD4 increase in count from baseline *** | All                                        | 5046 | 11255 | (44.8) | [43.9 - 45.8] | 2399  | 5823  | (41.2) | [40.0 - 42.5] | 1361 | 2550  | (53.4) | [51.4 - 55.3] | 1286  | 2882   | (44.6) | [42.6 - 46.4] | <0.001  |
|                                               | ART-Naïve                                  | 3072 | 3815  | (67.9) | [66.5 - 69.4] | 1315  | 1616  | (81.4) | [78.9 - 83.8] | 875  | 1054  | (83.0) | [80.8 - 85.3] | 882   | 1145   | (77.0) | [74.6 - 79.5] | <0.001  |
|                                               | ART-experienced, VL ≥200 cp/mL at baseline | 531  | 934   | (43.8) | [40.6 - 47.0] | 228   | 407   | (56.0) | [50.5 - 61.5] | 222  | 389   | (57.1) | [52.2 - 62.0] | 81    | 138    | (58.7) | [50.5 - 66.9] | 0.3137  |
|                                               | ART-experienced, VL <200 cp/mL at baseline | 1443 | 6506  | (18.1) | [17.2 - 19.0] | 856   | 3800  | (22.5) | [21.2 - 23.9] | 264  | 1107  | (23.8) | [21.3 - 26.4] | 323   | 1599   | (20.2) | [18.2 - 22.2] | 0.06    |
| ≥750 CD4 cells/μL ****                        | All                                        | 1644 | 8710  | (18.9) | [18.1 - 19.7] | 897   | 4297  | (20.9) | [19.5 - 22.2] | 337  | 2160  | (15.6) | [14.1 - 17.1] | 410   | 2253   | (18.2) | [16.6 - 19.8] | <0.001  |
|                                               | ART-Naïve                                  | 867  | 3556  | (24.4) | [23.0 - 25.8] | 430   | 1469  | (29.3) | [28.0 - 30.6] | 203  | 1016  | (20.0) | [17.5 - 22.4] | 234   | 1071   | (21.8) | [19.4 - 24.3] | <0.001  |
|                                               | ART-experienced, VL ≥200 cp/mL at baseline | 109  | 865   | (12.6) | [10.4 - 14.8] | 45    | 369   | (12.2) | [9.3 - 15.1]  | 34   | 367   | (9.3)  | [6.3 - 12.2]  | 30    | 129    | (23.3) | [16.0 - 30.5] | <0.001  |
|                                               | ART-experienced, VL <200 cp/mL at baseline | 668  | 4289  | (15.6) | [14.5 - 16.7] | 422   | 2459  | (17.2) | [15.0 - 19.3] | 100  | 777   | (12.9) | [10.5 - 15.2] | 146   | 1053   | (13.9) | [11.8 - 16.0] | 0.003   |

\*\*cTO success defined as a VL <200 cp/mL in individuals without failure (at least one of: VL ≥200 cp/mL, unknown VL, cART regimen changes, AIDS events or death)

\*\*persons with known VL at 12±3 months. without regimen changes (N =INSTI 4513; PI/b 1721; NNRTI 2263)

\*\*\*persons with known CD4 counts at 12±3 months. (N =INSTI 5823; PI/b 2550; NNRTI 2882)

\*\*\*\* persons with known CD4 counts at 12±3 months. excluding persons with ≥750 CD4 cells/μL at baseline (N =INSTI 4297; PI/b 2160; NNRTI 2253)
