# Supplementary material for: Virologic and immunologic outcomes of treatment with integrase inhibitors in a real-world setting: The RESPOND cohort consortium
Source: PubMed Central journal article supplement (PMC7774984; doi:10.1371/journal.pone.0243625), 2020-12-31
Supplement: pone.0243625.s003.pdf [file pone.0243625.s003.pdf]

**S3 Table. Reasons for cTO failure\* according to treatment status at baseline**

| Reason for cTO failure  | Treatment status at baseline               | All  |       |        |               | INSTI |       |        |               | PI/b |       | NNRTI  |               |     | p-value |        |               |         |
|-------------------------|--------------------------------------------|------|-------|--------|---------------|-------|-------|--------|---------------|------|-------|--------|---------------|-----|---------|--------|---------------|---------|
|                         |                                            | n**  | total | (%)    | 95% CI        | n**   | total | (%)    | 95% CI        | n**  | Total | (%)    | 95% CI        | n** |         | total  | (%)           | 95% CI  |
| <b>Viral failure***</b> | All                                        | 224  | 8497  | (2.6)  | [2.3 - 3.0]   | 82    | 4513  | (1.8)  | [1.4 - 2.2]   | 93   | 1721  | (5.4)  | [4.3 - 6.5]   | 49  | 2263    | (2.2)  | [1.6 - 2.8]   | <0.0001 |
|                         | ART-Naïve                                  | 87   | 2780  | (3.1)  | [2.5 - 3.8]   | 22    | 1211  | (1.8)  | [1.1 - 2.6]   | 36   | 674   | (5.3)  | [3.6 - 7.0]   | 29  | 895     | (3.2)  | [2.1 - 4.4]   | <0.0001 |
|                         | ART-experienced, VL ≥200 cp/mL at baseline | 72   | 604   | (11.9) | [9.3 - 14.5]  | 23    | 265   | (8.7)  | [5.3 - 12.1]  | 38   | 256   | (14.8) | [10.5 - 19.2] | 11  | 83      | (13.3) | [6.0 - 20.5]  | 0.087   |
|                         | ART-experienced, VL <200 cp/mL at baseline | 65   | 5113  | (1.3)  | [1.0 - 1.6]   | 37    | 3037  | (1.2)  | [0.8 - 1.6]   | 19   | 791   | (2.4)  | [1.3 - 3.5]   | 9   | 1285    | (0.7)  | [0.2 - 1.2]   | 0.0032  |
| <b>Unknown VL</b>       | All                                        | 2278 | 13703 | (16.6) | [16.0 - 17.2] | 1153  | 7147  | (16.1) | [15.3 - 17.0] | 537  | 3102  | (17.3) | [16.0 - 18.6] | 588 | 3454    | (17.0) | [15.8 - 18.3] | 0.26    |
|                         | ART-Naïve                                  | 699  | 4521  | (15.5) | [14.4 - 16.5] | 274   | 1914  | (14.3) | [12.7 - 15.9] | 197  | 1248  | (15.8) | [13.8 - 17.8] | 228 | 1359    | (16.8) | [14.8 - 18.8] | 0.14    |
|                         | ART-experienced, VL ≥200 cp/mL at baseline | 295  | 1213  | (24.3) | [21.9 - 26.7] | 133   | 538   | (24.7) | [21.1 - 28.4] | 119  | 500   | (23.8) | [20.1 - 27.5] | 43  | 175     | (24.6) | [18.2 - 30.9] | 0.94    |
|                         | ART-experienced, VL <200 cp/mL at baseline | 1284 | 7969  | (16.1) | [15.3 - 16.9] | 746   | 4695  | (15.9) | [14.8 - 16.9] | 221  | 1354  | (16.3) | [14.4 - 18.3] | 317 | 1920    | (16.5) | [14.8 - 18.2] | 0.80    |
| <b>Regimen changes</b>  | All                                        | 3449 | 13703 | (25.2) | [24.4 - 25.9] | 1741  | 7147  | (24.4) | [23.4 - 25.4] | 981  | 3102  | (31.6) | [30.0 - 33.3] | 727 | 3454    | (21.0) | [19.7 - 22.4] | <0.0001 |
|                         | ART-Naïve                                  | 1198 | 4521  | (26.5) | [25.2 - 27.8] | 490   | 1914  | (25.6) | [23.6 - 27.6] | 424  | 1248  | (34.0) | [31.3 - 36.6] | 284 | 1359    | (20.9) | [18.7 - 23.1] | <0.0001 |
|                         | ART-experienced, VL ≥200 cp/mL at baseline | 420  | 1213  | (34.6) | [31.9 - 37.3] | 182   | 538   | (33.8) | [29.8 - 37.8] | 176  | 500   | (35.2) | [31.0 - 39.4] | 62  | 175     | (35.4) | [28.3 - 42.5] | 0.87    |
|                         | ART-experienced, VL <200 cp/mL at baseline | 1831 | 7969  | (23.0) | [22.1 - 23.9] | 1069  | 4695  | (22.8) | [21.6 - 24.0] | 381  | 1354  | (28.1) | [25.7 - 30.5] | 381 | 1920    | (19.8) | [18.1 - 21.6] | <0.0001 |
| <b>AIDS</b>             | All                                        | 201  | 13703 | (1.5)  | [1.3 - 1.7]   | 90    | 7147  | (1.3)  | [1.0 - 1.5]   | 76   | 3102  | (2.5)  | [1.9 - 3.0]   | 35  | 3454    | (1.0)  | [0.7 - 1.3]   | <0.0001 |
|                         | ART-Naïve                                  | 140  | 4521  | (3.1)  | [2.6 - 3.6]   | 63    | 1914  | (3.3)  | [2.5 - 4.1]   | 48   | 1248  | (3.8)  | [2.8 - 4.9]   | 29  | 1359    | (2.1)  | [1.4 - 2.9]   | 0.034   |
|                         | ART-experienced, VL ≥200 cp/mL at baseline | 37   | 1213  | (3.1)  | [2.1 - 4.0]   | 15    | 538   | (2.8)  | [1.4 - 4.2]   | 18   | 500   | (3.6)  | [2.0 - 5.2]   | 4   | 175     | (2.3)  | [0.1 - 4.5]   | 0.61    |
|                         | ART-experienced, VL <200 cp/mL at baseline | 24   | 7969  | (0.3)  | [0.2 - 0.4]   | 12    | 4695  | (0.3)  | [0.1 - 0.4]   | 10   | 1354  | (0.7)  | [0.3 - 1.2]   | 2   | 1920    | (0.1)  | [0.0 - 0.2]   | 0.0033  |
| <b>Death</b>            | All                                        | 108  | 13703 | (0.8)  | [0.6 - 0.9]   | 75    | 7147  | (1.0)  | [0.8 - 1.3]   | 25   | 3102  | (0.8)  | [0.5 - 1.1]   | 8   | 3454    | (0.2)  | [0.1 - 0.4]   | <0.0001 |
|                         | ART-Naïve                                  | 31   | 4521  | (0.7)  | [0.4 - 0.9]   | 17    | 1914  | (0.9)  | [0.5 - 1.3]   | 8    | 1248  | (0.6)  | [0.2 - 1.1]   | 6   | 1359    | (0.4)  | [0.1 - 0.8]   | 0.30    |
|                         | ART-experienced, VL ≥200cp/mL at baseline  | 27   | 1213  | (2.2)  | [1.4 - 3.1]   | 17    | 538   | (3.2)  | [1.7 - 4.6]   | 10   | 500   | (2.0)  | [0.8 - 3.2]   | 0   | 175     | (0.0)  | [0.0 - 0.0]   | 0.044   |
|                         | ART-experienced, VL <200 cp/mL at baseline | 50   | 7969  | (0.6)  | [0.5 - 0.8]   | 41    | 4695  | (0.9)  | [0.6 - 1.1]   | 7    | 1354  | (0.5)  | [0.1 - 0.9]   | 2   | 1920    | (0.1)  | [0.0 - 0.2]   | 0.0013  |

\*cTO failure was defined as at least one of: VL ≥200 cp/mL., unknown VL., any antiretroviral treatment (ART)-regimen change., AIDS, or death (note that it is possible to fail more than one parameter)

\*\* number of specific reasons for cTO failure

\*\*\*persons with known VL at 12±3 months. without regimen changes
